# Supplementary material for: Different Cosmetic Habits Can Affect the Biophysical Profile of Facial Skin: A Study of Korean and Chinese Women
Source: PubMed Central journal article supplement — Ann Dermatol. 2019 Feb 28;31(2):175–85. doi: 10.5021/ad.2019.31.2.175 (PMC7992690; doi:10.5021/ad.2019.31.2.175), 2019-02-28
Supplement: ad-31-175-s001.pdf [file ad-31-175-s001.pdf]

**Supplementary Table 1.** Simple linear regression of age for biophysical parameters

| Dependent variable          | R-squared | B      | t      | p-value  |
|-----------------------------|-----------|--------|--------|----------|
| Temperature (°C)            |           |        |        |          |
| Cheek                       | 0.032     | 35.891 | 56.795 | 0.000*** |
| Forehead                    | 0.019     | -0.006 | -2.633 | 0.009**  |
| Hydration (AU)              |           |        |        |          |
| Cheek                       | 0.006     | 0.080  | 1.425  | 0.155    |
| Forehead                    | 0.006     | 0.082  | 1.497  | 0.135    |
| TEWL (g/m <sup>2</sup> )    |           |        |        |          |
| Cheek                       | 0.003     | -0.025 | -1.053 | 0.293    |
| Forehead                    | 0.019     | -0.056 | -2.610 | 0.009**  |
| Sebum (μg/cm <sup>2</sup> ) |           |        |        |          |
| Cheek                       | 0.026     | -1.196 | -3.091 | 0.002**  |
| Forehead                    | 0.043     | -2.306 | -3.994 | 0.000*** |
| Elasticity (R2)             | 0.126     | -0.005 | -7.190 | 0.000*** |
| Pore size (%)               | 0.297     | 0.591  | 12.330 | 0.000*** |
| Wrinkle (%)                 | 0.455     | 0.600  | 17.314 | 0.000*** |
| Skin tone (%)               | 0.141     | -0.124 | -7.663 | 0.000*** |

R-squared: determination coefficient, B: unstandardized regression coefficient, t=B/standard error, AU: arbitrary units, TEWL: transepidermal water loss. \*\* $p < 0.01$ , \*\*\* $p < 0.001$ .
